# Supplementary material
Source: PubMed Central journal article supplement (PMC2770779)

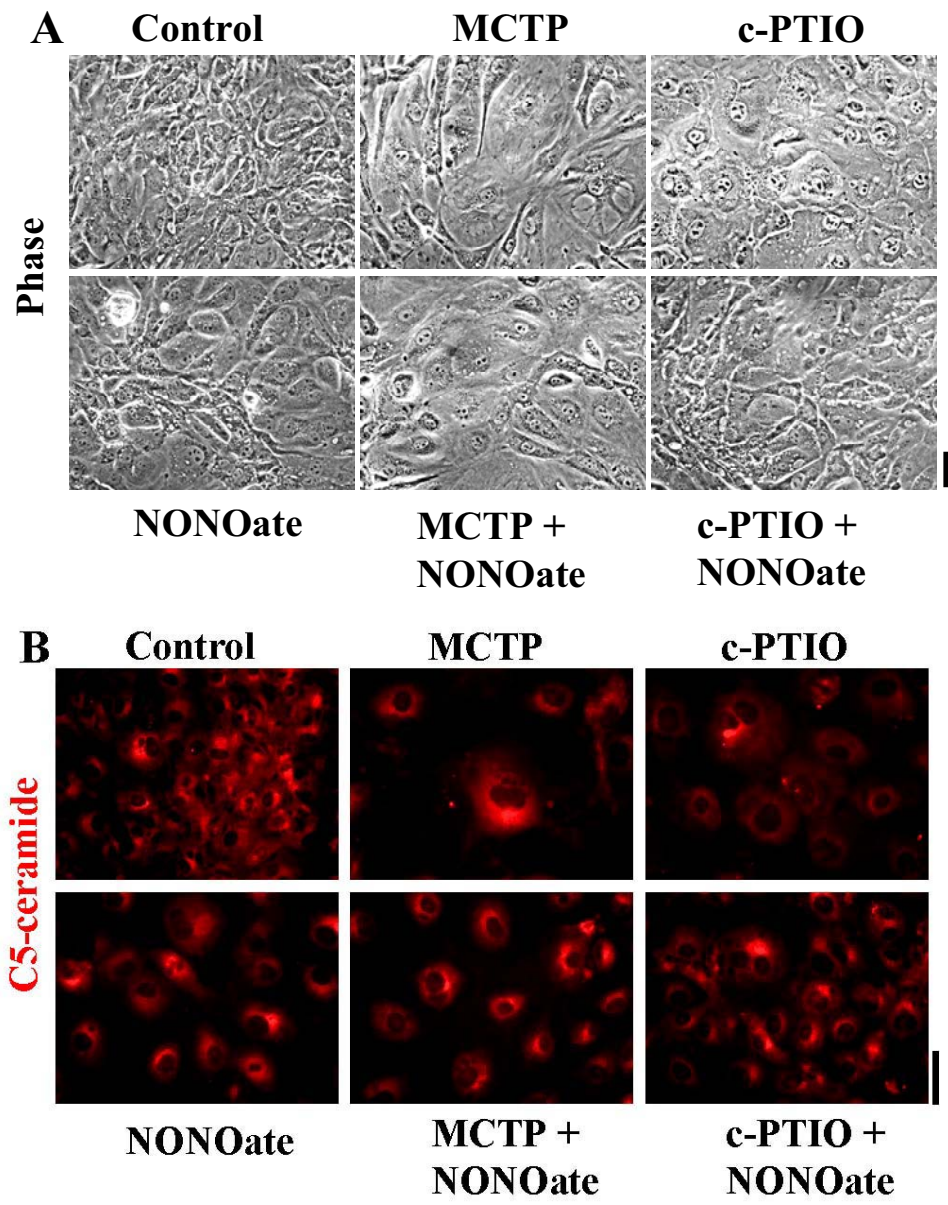

Suppl Figure 1

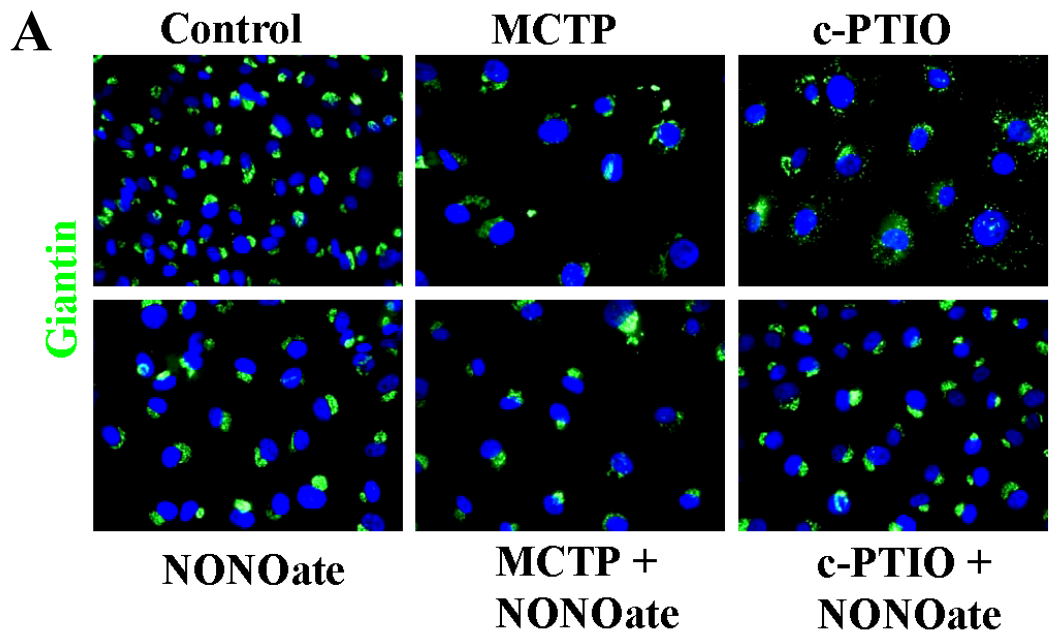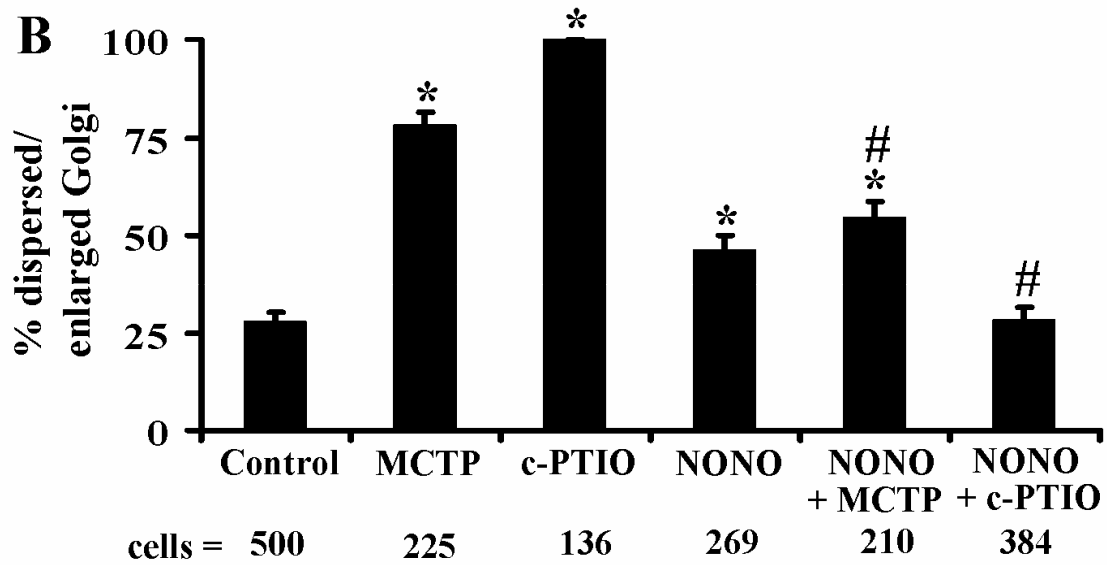

Suppl Figure 2

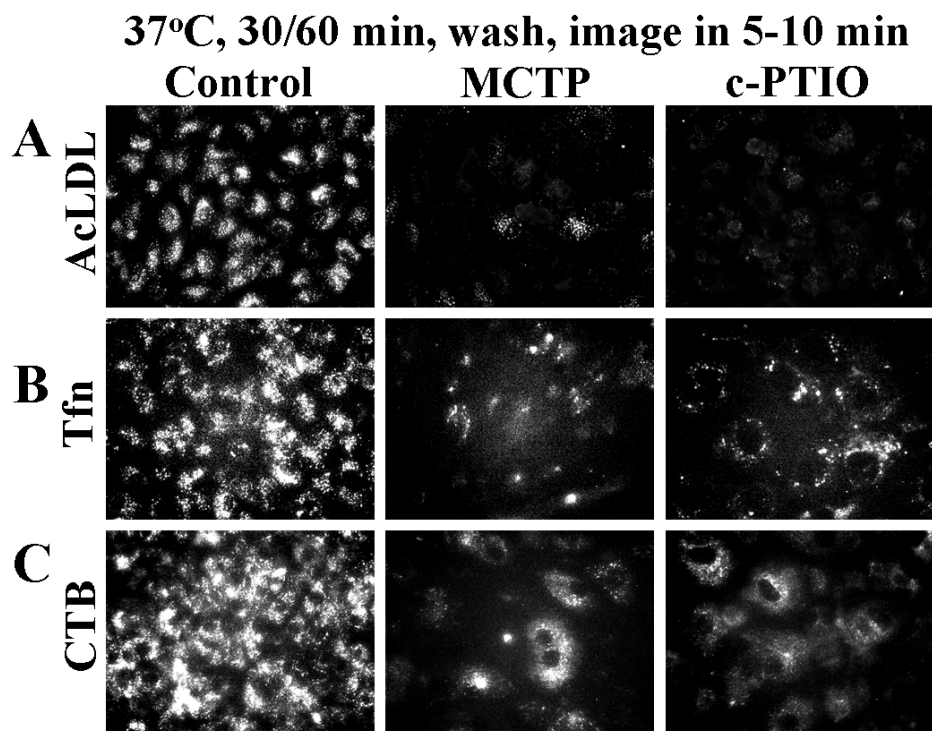

**D Tfn (4°C, 30 min, wash, then 37°C, 30 min, image)**

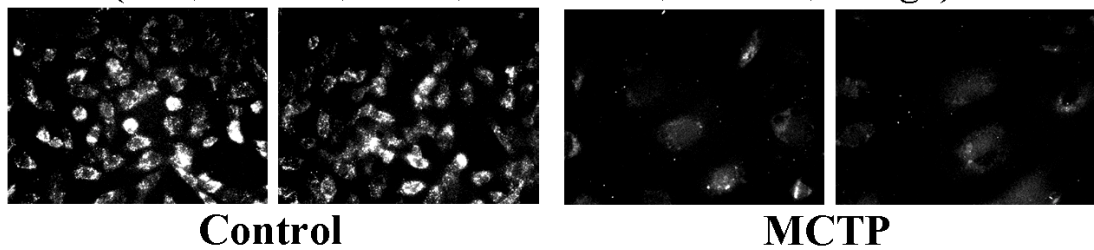

**E Tfn (37°C, 90 min, wash, image)**

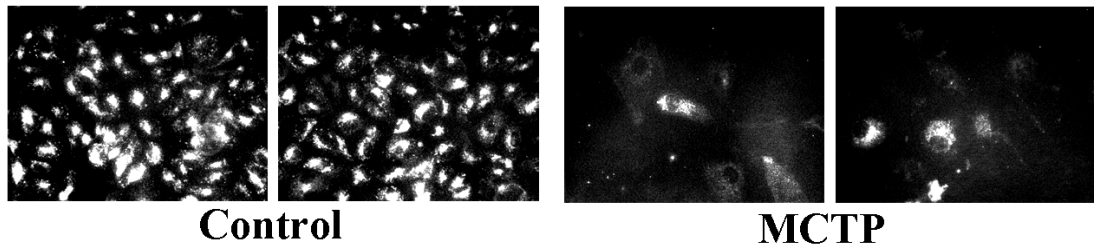

Supplement: 00086.2009_1.pdf [file 00086.2009_1.pdf]
